# Supplementary material
Source: PubMed Central journal article supplement (PMC6959549)
Supplement: NIHMS1066854-supplement-SI.pdf [file NIHMS1066854-supplement-SI.pdf]

**Electron Paramagnetic Resonance Spectroscopic Identification of the Fe–S Clusters in the SPASM Domain-Containing Radical SAM Enzyme PqqE**

Lizhi Tao<sup>1#</sup>, Wen Zhu<sup>2#</sup>, Judith P. Klinman<sup>2\*</sup> and R. David Britt<sup>1\*</sup>

<sup>1</sup>Department of Chemistry, University of California, Davis, California 95616, United States

<sup>2</sup>Department of Chemistry, Department of Molecular and Cell Biology, and California Institute for Quantitative Biosciences, University of California, Berkeley, California 94720, United States

\*Corresponding Authors: [klinman@berkeley.edu](mailto:klinman@berkeley.edu) and [rdbritt@ucdavis.edu](mailto:rdbritt@ucdavis.edu)

## Table of Contents

- Table S1.** Primers and DNA templates used in the mutagenesis in this study.
- Figure S1.** Temperature dependence and power dependence of the EPR signals of dithionite-reduced *RS-only* variant.
- Figure S2.** Temperature dependence and power dependence of the EPR signals of dithionite-reduced *AuxI/AuxII*.
- Figure S3.** X-band (9.37 GHz) CW EPR and Q-band (34.0 GHz) pseudo-modulated electron spin-echo detected field-swept EPR spectra of dithionite-reduced *AuxI/AuxII* sample with the addition of ~100 equivalents of  $K^{13}C^{15}N$ .
- Figure S4.** X-band (9.37 GHz) CW EPR and Q-band (34.0 GHz) pseudo-modulated electron spin-echo detected field-swept EPR spectra of dithionite-reduced *AuxI/AuxII/D319H* and *AuxI/AuxII/D319C*.
- Figure S5.** The simulated X-band (9.403 GHz)  $^{14}N$ -HYSCORE spectrum of dithionite-reduced *AuxI/AuxII/D319H*.
- Figure S6.** X-band (9.37 GHz) CW EPR spectra of Ti(III) citrate-reduced PqqE samples of WT, *AuxI/AuxII*, *RS/AuxI*, *RS/AuxII*, *AuxI/AuxIID319H*, *AuxI/AuxII/D319C* and *RS-only*.
- Figure S7.** X-band (9.37 GHz) CW EPR spectra of Ti(III) citrate-reduced *RS/AuxI* PqqE variant before and after the addition of ~110 equivalents of  $K^{13}C^{15}N$ .
- Figure S8.** Q-band (34.0 GHz) pseudo-modulated electron spin-echo detected field-swept EPR spectrum of Ti(III) citrate-reduced WT PqqE.
- Figure S9.** X-band (9.37 GHz) CW EPR spectra of dithionite-reduced *RS/AuxI* and *RS/AuxII*.
- Figure S10.** Temperature dependence and power dependence of the EPR signals of Ti(III) citrate-reduced WT PqqE.
- Figure S11.** X-band (9.37 GHz) CW EPR spectra of Eu(II)-DTPA-reduced WT PqqE before and after desalting.
- Figure S12.** X-band (9.37 GHz) CW EPR of dithionite-reduced two batches of the *AuxI/AuxII* samples.
- Figure S13.** Temperature dependence and power dependence of the EPR signals of [2Fe–2S] cluster at 10 K.

**Table S1** Primers and DNA templates used in the mutagenesis in this study.

| <b>Primer</b>                    | <b>Sequence</b>                                                 | <b>DNA template</b> |
|----------------------------------|-----------------------------------------------------------------|---------------------|
| C28A forward                     | 5'- GTT AAC GCA CCG TGC<br>TCC ATT GCG TTG C -3'                | wild-type           |
| C28A reverse                     | 5'- GCA ACG CAA TGG AGC<br>ACG GTG CGT TAA C -3'                |                     |
| C28A/C32A/C35A forward           | 5'- CAC CGT GCT CCA TTG<br>CGT GCC CCT TAT GCT AGT<br>AAT C -3' | C28A                |
| C28A/C32A/C35A reverse           | 5'- GAT TAC TAG CAT AAG<br>GGG CAC GCA ATG GAG CAC<br>GGT G -3' |                     |
| C28A/C32A/C35A/D319H forward     | 5'- GAT CGT CGT GAG AAA<br>CAT TGG GGG GGA TGT C -3'            | C28A/C32A/C35A      |
| C28A/C32A/C35A/D319H reverse     | 5'- GAC ATC CCC CCC AAT<br>GTT TCT CAC GAC GAT C -3'            |                     |
| C28A/C32A/C35A/D319C forward     | 5'- GAT CGT CGT GAG AAA<br>TGT TGG GGG GGA TGT C -3'            | C28A/C32A/C35A      |
| C28A/C32A/C35A/D319C reverse     | 5'- GAC ATC CCC CCC AAC<br>ATT TCT CAC GAC GAT C -3'            |                     |
| C310A forward                    | 5'- GAT GAA GGA GCC AGC<br>TCG CTC CTG TGA TCG -3'              | wild-type           |
| C310A reverse                    | 5'- CGA TCA CAG GAG CGA<br>GCT GGC TCC TTC ATC -3'              |                     |
| C310A/C313A forward              | 5'- GCC AGC TCG CTC CGC<br>TGA TCG TCG TGA G -3'                | C310A               |
| C310A/C313A reverse              | 5'- CTC ACG ACG ATC AGC<br>GGA GCG AGC TGG C -3'                |                     |
| C268A forward                    | 5'- GGA AAG TCT TAC CTG<br>CCC ACG CTG CTG AGA C -3'            | wild-type           |
| C268A reverse                    | 5'- GTC TCA GCA GCG TGG<br>GCA GGT AAG ACT TTC C -3'            |                     |
| C248A/C268A forward              | 5'- CAA ATA TCC TAA GGC<br>GTG GCC GGG CGG TTG G -3'            | C268A               |
| C248A/C268A reverse              | 5'- CCA ACC GCC CGG CCA<br>CGC CTT AGG ATA TTT G -3'            |                     |
| C310A/C313A/C323A forward        | 5'- GAT TGG GGG GGA GCT<br>CGC TGT CAA G -3'                    | C310A/C313A         |
| C310A/C313A/C323A reverse        | 5'- CTT GAC AGC GAG CTC<br>CCC CCC AAT C -3'                    |                     |
| C310A/C313A/C323A /C325A forward | 5'- GGG AGC TCG CGC TCA<br>AGC ATT GGC CTT AAC -3'              | C310A/C313A/C323A   |
| C310A/C313A/C323A /C325A reverse | 5'- GTT AAG GCC AAT GCT<br>TGA GCG CGA GCT CCC -3'              |                     |

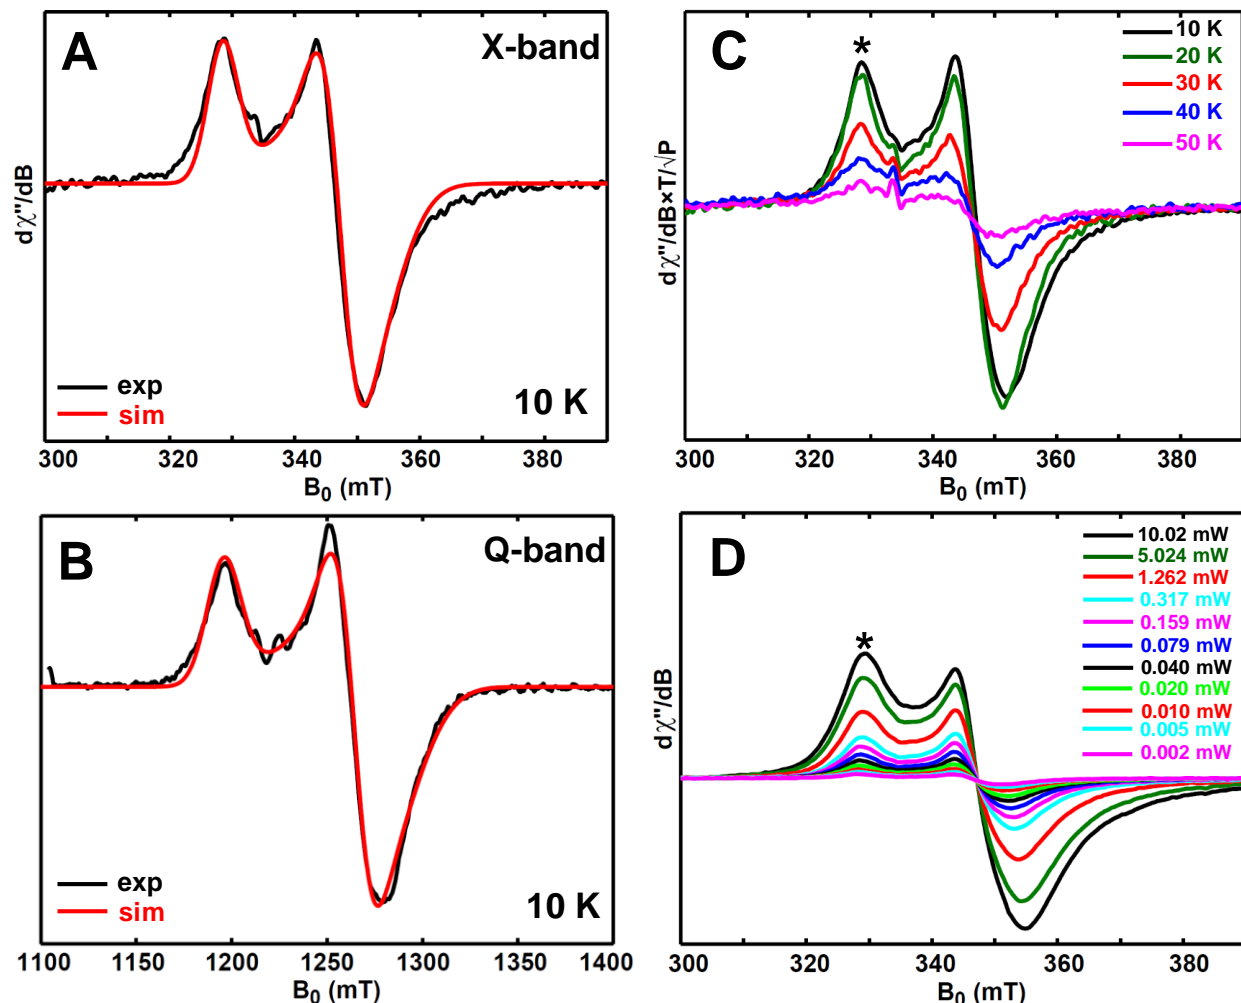

**Figure S1.** X-band (9.38 GHz) CW EPR (A) and Q-band (34.0 GHz) pseudo-modulated electron spin-echo detected field-swept EPR spectra (B) of dithionite-reduced double-knockout PqqE variant of *RS only*. The black traces are experimental spectra, while the red traces are the simulated spectra by employing the  $g$ -values = [2.040, 1.927, 1.897]. The X-band CW EPR spectra was recorded at 10 K, with 0.02 mW microwave power (no saturation). The Q-band EPR spectra was recorded at 10 K by using a two-pulse sequence of  $\pi/2$ - $\tau$ - $\pi$ - $\tau$ -echo, with  $\pi/2 = 12$  ns and  $\tau = 300$  ns. The modulation amplitude of 3.0 mT was used to convert the absorption spectra to the pseudo-modulated spectra in (B).

Temperature dependence (C) and power dependence (D) of the EPR signals of dithionite-reduced *RS-only* variant. The asterisk indicates the  $g_1$  2.040 position, where the peak amplitudes are employed as the signal intensities of the RS cluster shown in Figure 4 (blue diamonds).

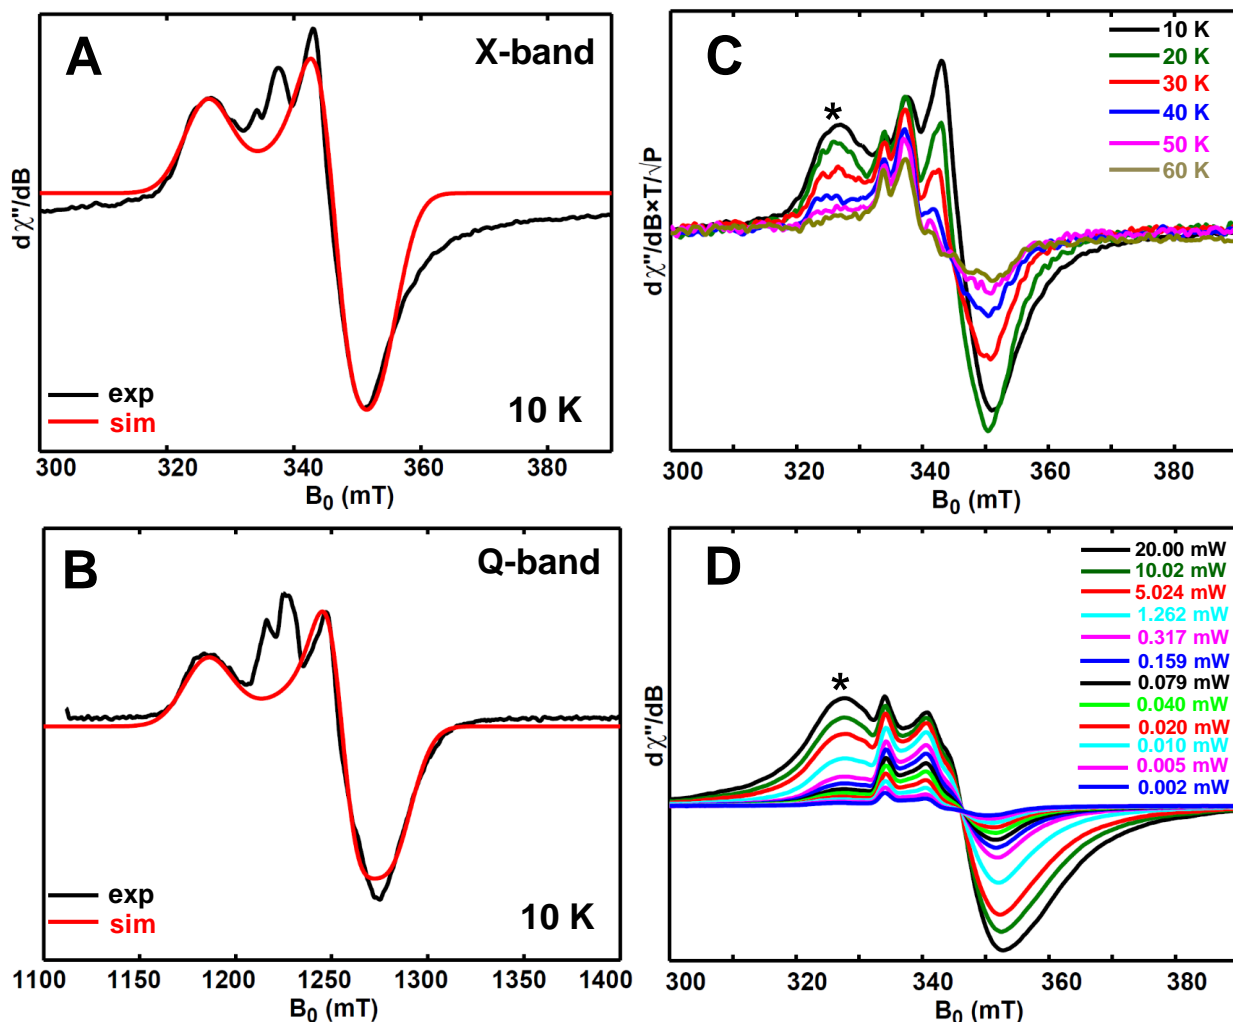

**Figure S2.** X-band (9.38 GHz) CW EPR (A) and Q-band (34.0 GHz) pseudo-modulated electron spin-echo detected field-swept EPR spectra (B) of dithionite-reduced *AuxI/AuxII*. The black traces are experimental spectra, while the red traces are the simulated spectra by employing the  $g$ -values = [2.059, 1.940, 1.903]. The X-band CW EPR spectrum was recorded at 10 K, with 0.02 mW microwave power (no saturation). The Q-band EPR spectrum was recorded at 10 K by using a two-pulse sequence of  $\pi/2$ - $\tau$ - $\pi$ - $\tau$ -echo, with  $\pi/2 = 12$  ns and  $\tau = 300$  ns. The modulation amplitude of 3.0 mT was used to convert the absorption spectra to the pseudo-modulated spectra in (B).

Temperature dependence (C) and power dependence (D) of the EPR signals of dithionite-reduced *AuxI/AuxII*. The asterisk indicates the  $g_1$  2.059 position, where the peak amplitudes are employed as the major-component signal intensities of the AuxII cluster shown in Figure 4 (magenta squares).

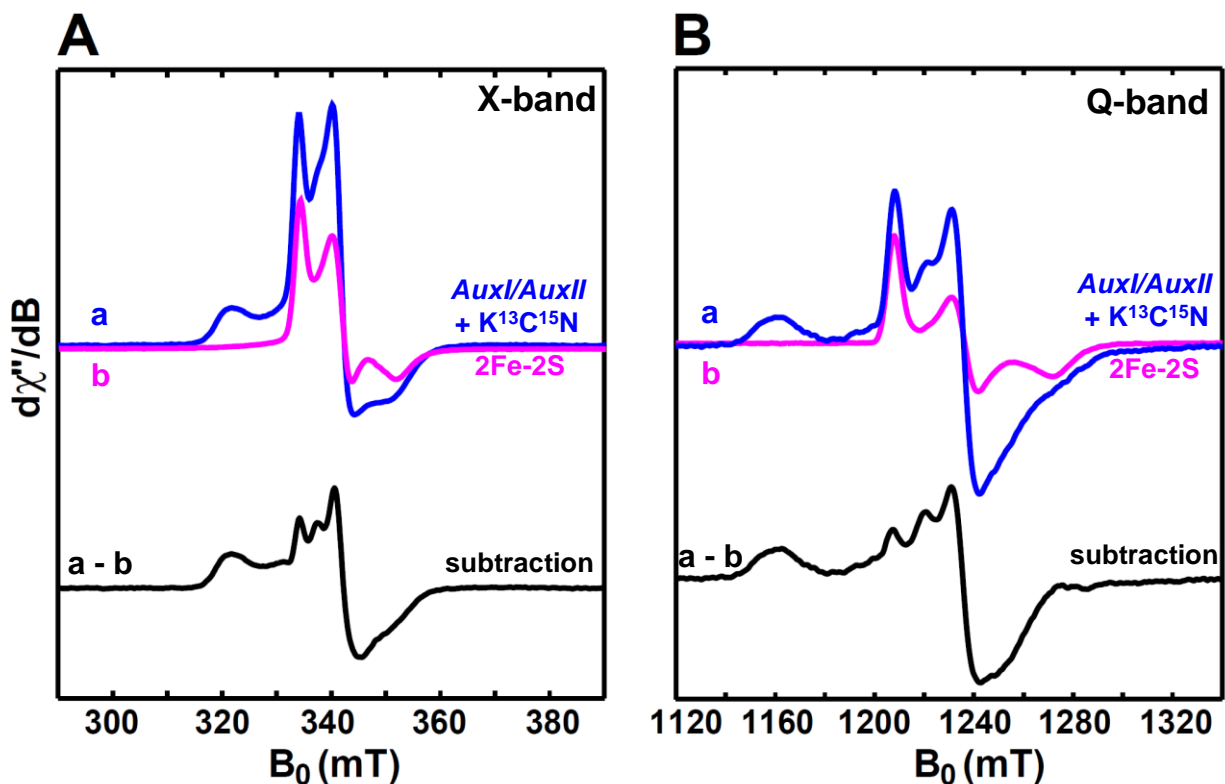

**Figure S3.** X-band (9.37 GHz) CW EPR (A) and Q-band (34.0 GHz) pseudo-modulated electron spin-echo detected field-swept EPR spectra (B) of dithionite-reduced *AuxI/AuxII* sample with the addition of  $\sim 100$  equivalents of  $K^{13}C^{15}N$ . The blue traces are the original spectra, showing that the  $[2Fe-2S]^+$  cluster signal was observed upon the  $K^{13}C^{15}N$  addition. The black traces are the spectra we show in Figure 6, with the  $[2Fe-2S]^+$  signal being subtracted away. The  $[2Fe-2S]^+$  cluster signal (magenta traces) is adopted from the high-temperature EPR spectra of dithionite-reduced *RS/AuxI* (Figure S13), where only the  $[2Fe-2S]^+$  cluster signal is persisting due to its slow-relaxation properties.

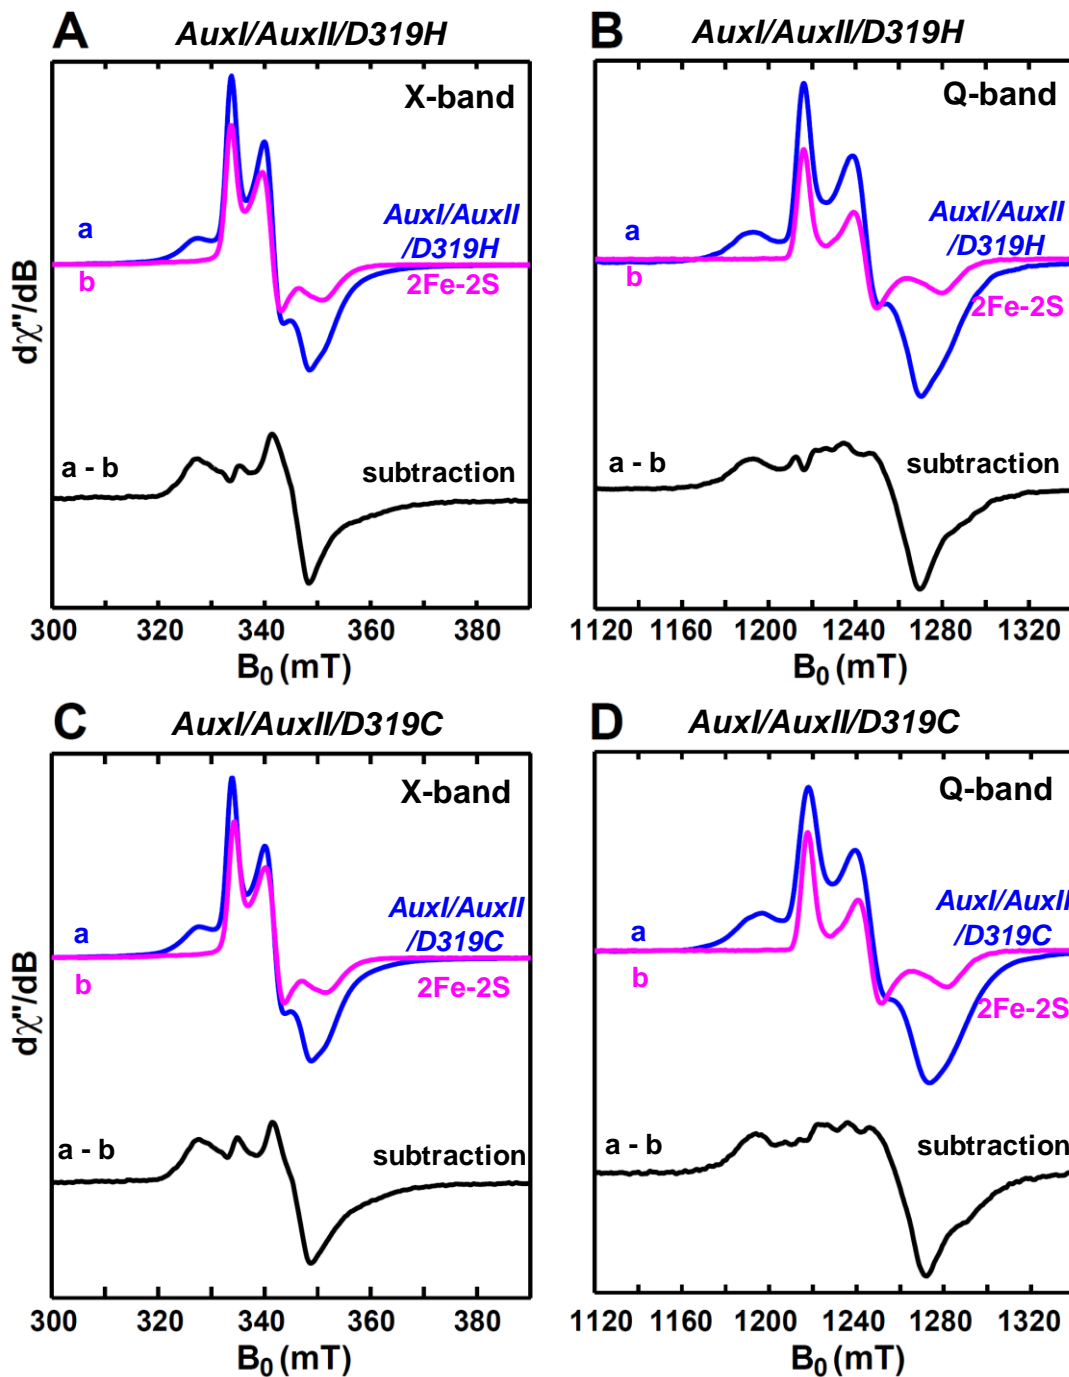

**Figure S4.** X-band (9.37 GHz) CW EPR (A, C) and Q-band (34.0 GHz) pseudo-modulated electron spin-echo detected field-swept EPR spectra (B, D) of dithionite-reduced *AuxI/AuxII/D319H* and *AuxI/AuxII/D319C*. The blue traces are the original spectra, showing that the  $[2Fe-2S]^+$  cluster signal was observed. The black traces are the spectra we show in Figure 6, with the  $[2Fe-2S]^+$  signal being subtracted away.

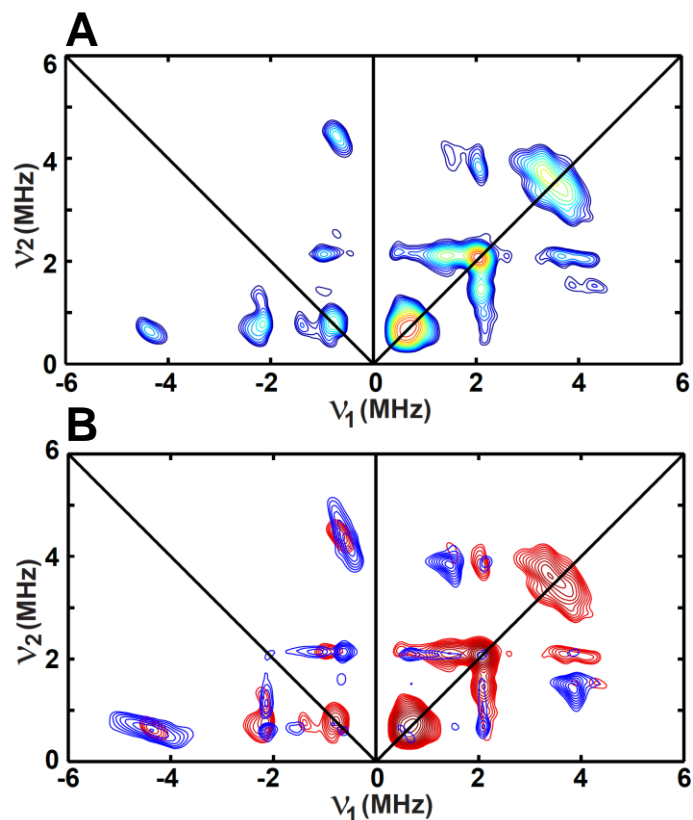

**Figure S5.** (A) X-band (9.403 GHz) HSCORE spectra of dithionite-reduced *AuxI/AuxII/D319H* acquired at the magnetic field position (328.4 mT) corresponding to the  $g$ -value of 2.046. This spectrum is also shown in Figure 8C.

(B) The simulated  $^{14}\text{N}$ -HYSCORE spectra are shown in blue (contour plot) by using the parameters of  $g = [2.087, 1.955, 1.941]$ ;  $A(^{14}\text{N}) = [0.73, 3.25, 1.01\text{MHz}]$ , Euler angle =  $[55, 100, 25]^\circ$  referring to  $\mathbf{A}$  tensor to  $\mathbf{g}$  tensor,  $P(^{14}\text{N}) = [0.23, -1.02, 0.79]\text{MHz}$ , Euler angle =  $[50, 27, 20]^\circ$  referring to  $\mathbf{P}$  tensor to  $\mathbf{A}$  tensor. The quadrupole coupling values we report here are defined as  $[P_1, P_2, P_3] = e^2Qq/4I(2I-1)h[-1+\eta, 2, -1-\eta]$ , with the asymmetry parameter  $\eta = 0.55$ .



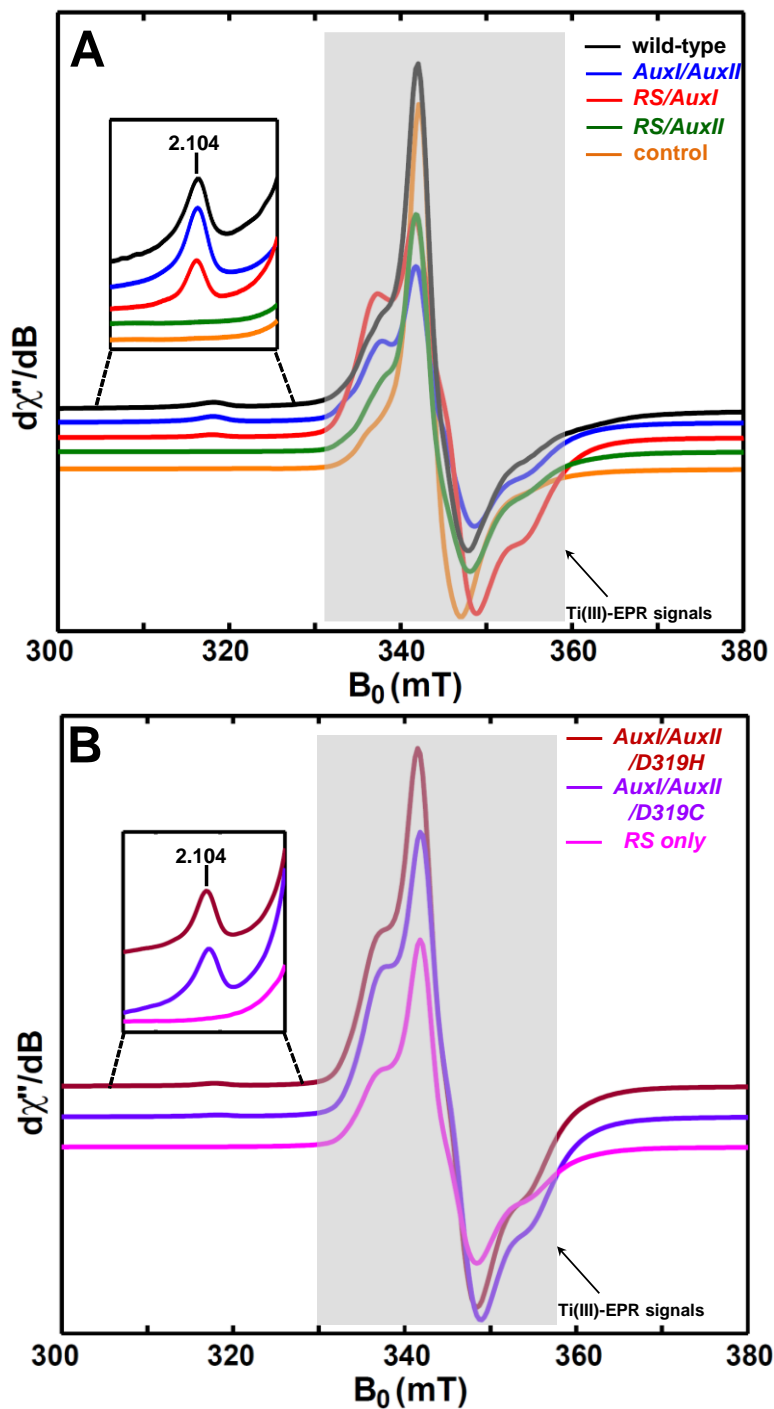

**Figure S6.** X-band (9.37 GHz) CW EPR spectra of Ti(III) citrate-reduced PqqE samples of wild-type (black trace), *AuxI/AuxII* (blue trace), *RS/AuxI* (red trace), *RS/AuxII* (green trace), *AuxI/AuxII/D319H* (burgundy trace), *AuxI/AuxII/D319C* (purple trace) and *RS only* (magenta trace). The control sample (orange trace) is Ti(III) citrate in HEPES-buffered solution. The CW EPR spectra were recorded at 10 K using 2.518 mW microwave power (no saturation).

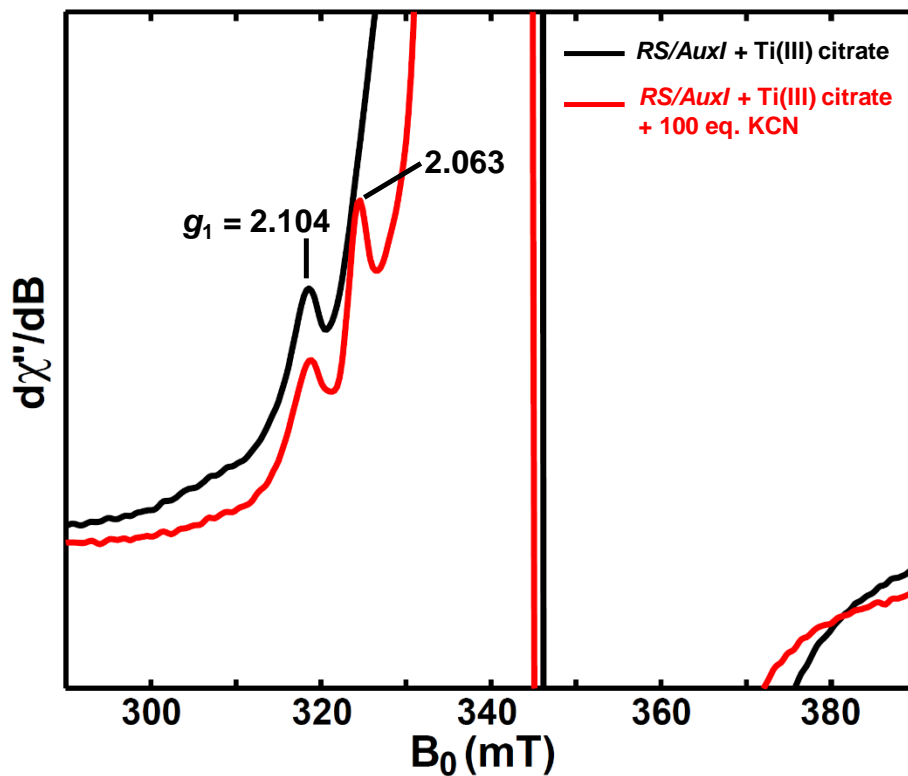

**Figure S7.** X-band (9.37 GHz) CW EPR spectra of Ti(III) citrate-reduced *RS/AuxI* PqqE variant (black trace) before (black trace) and after the addition of 110 equivalents of  $K^{13}C^{15}N$ . The CW EPR spectra were recorded at 10 K using 2.518 mW microwave power (no saturation). The signal with  $g = 2.063$  arises from the CN-bound  $[4Fe-4S]^+_{RS}$  species, as described in section of [Characterization of the Radical SAM  \$\[4Fe-4S\]\_{RS}\$  Cluster](#).

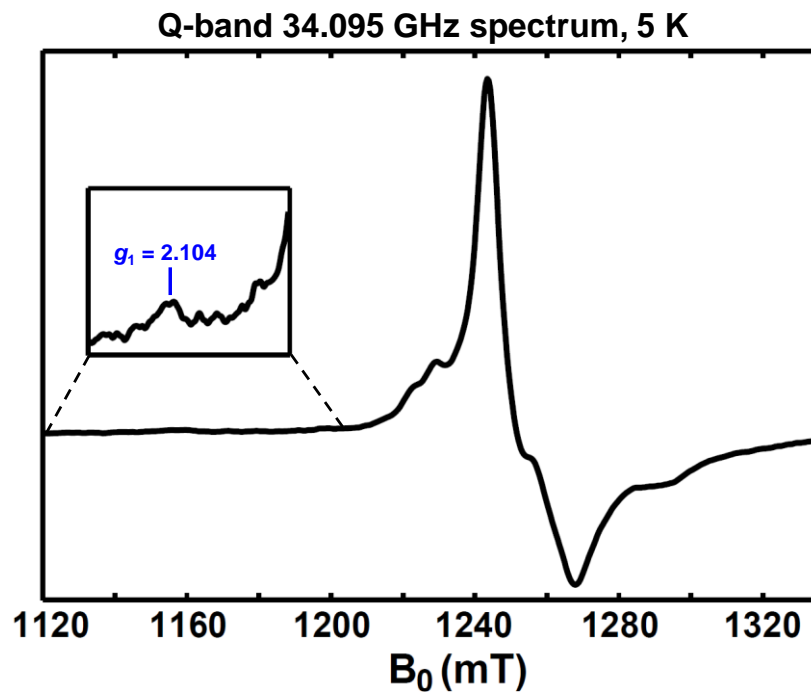

**Figure S8.** Q-band (34.0 GHz) pseudo-modulated electron spin-echo detected field-swept EPR spectrum of Ti(III) citrate-reduced wild-type PqqE. The spectrum was recorded at 5 K by using a two-pulse sequence of  $\pi/2$ - $\tau$ - $\pi$ - $\tau$ -echo, with  $\pi/2 = 12$  ns and  $\tau = 300$  ns. The modulation amplitude of 3.0 mT was used to convert the absorption spectrum to the pseudo-modulated spectrum.

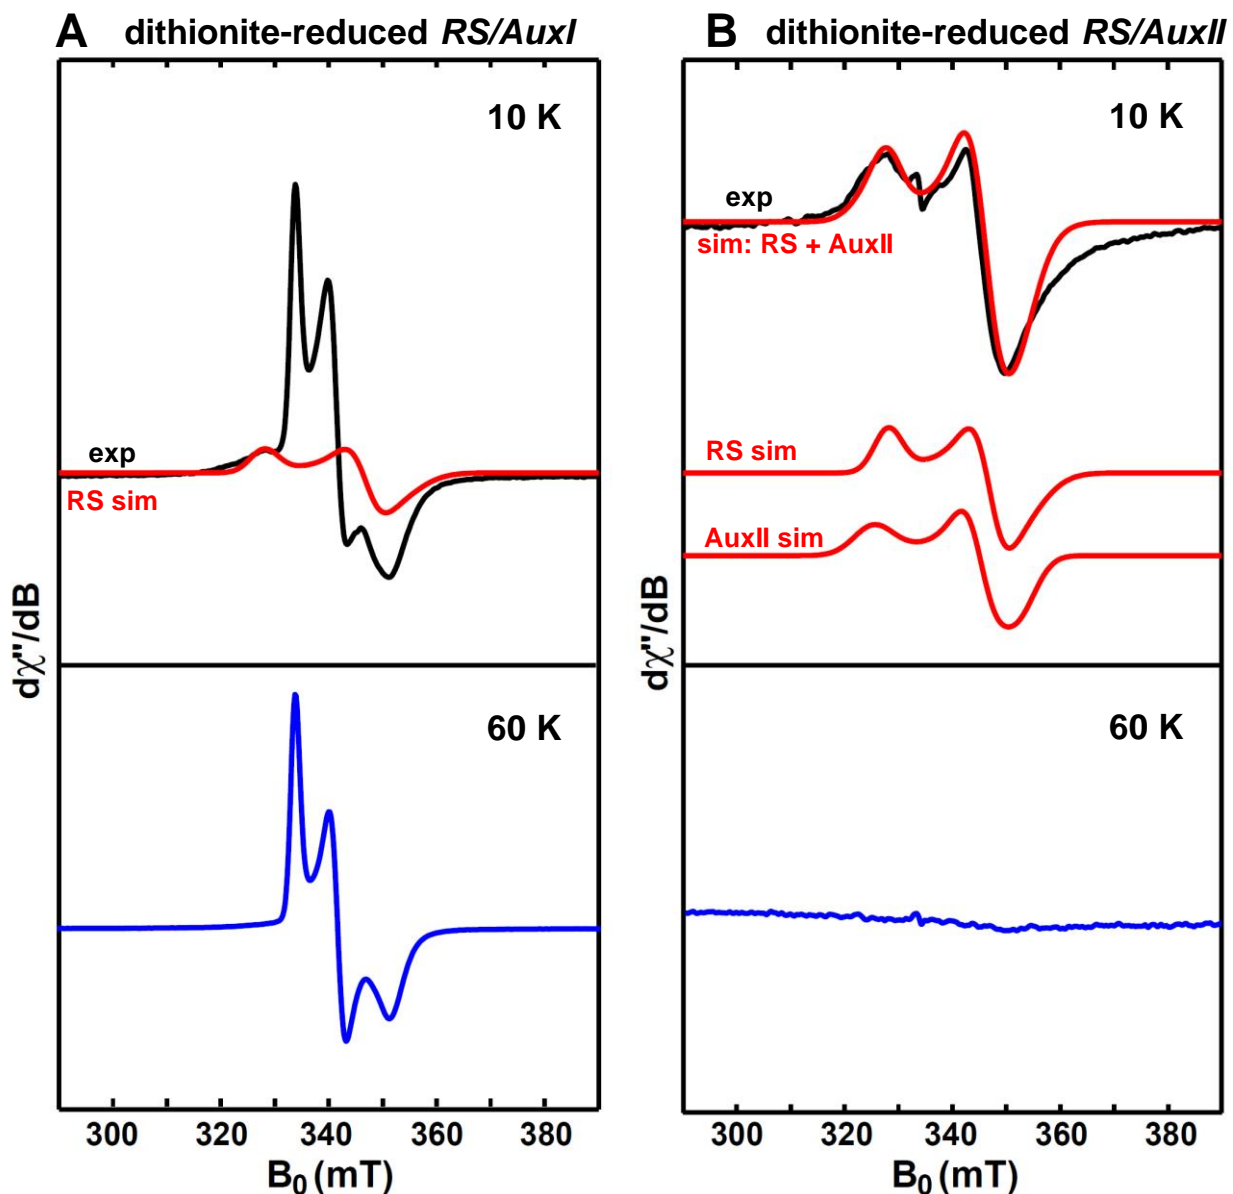

**Figure S9.** X-band (9.37 GHz) CW EPR spectra of dithionite-reduced *RS/AuxI* (A) and *RS/AuxII* (B). The experimental spectrum in (A, black trace) is dominated by the  $[2\text{Fe-2S}]^+$  cluster signal, as well as the observable component that can be simulated by using the  $g$ -values = [2.040, 1.927, 1.897], corresponding to the RS cluster signal.

The experimental spectrum in (B, black trace) has two components. This spectrum can be well simulated by employing two components with the ratio of 1:1; one corresponds to the RS cluster with  $g$ -values = [2.040, 1.927, 1.897] and the other one is the AuxII cluster with  $g$ -values = [2.059, 1.940, 1.903].

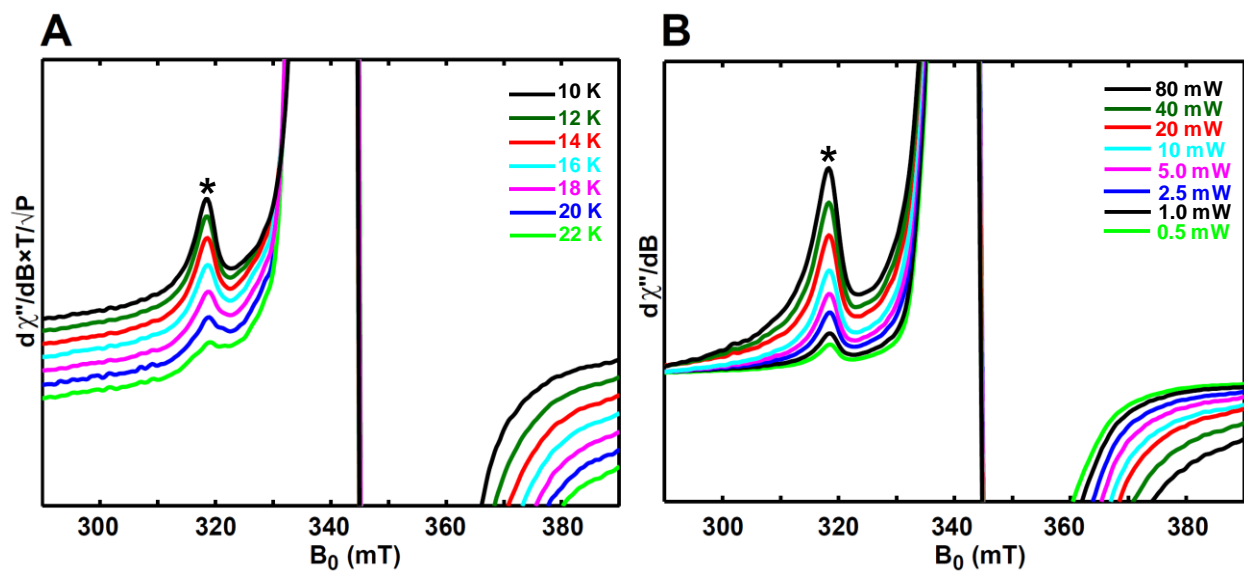

**Figure S10.** Temperature dependence (A) and power dependence (B) of the EPR signals of Ti(III) citrate-reduced WT PqqE. The asterisk indicates the  $g_1$  2.104 position, where the peak amplitudes are employed as the signal intensities of the AuxI [4Fe-4S]<sup>+</sup> cluster shown in Figure 4 (red circles).

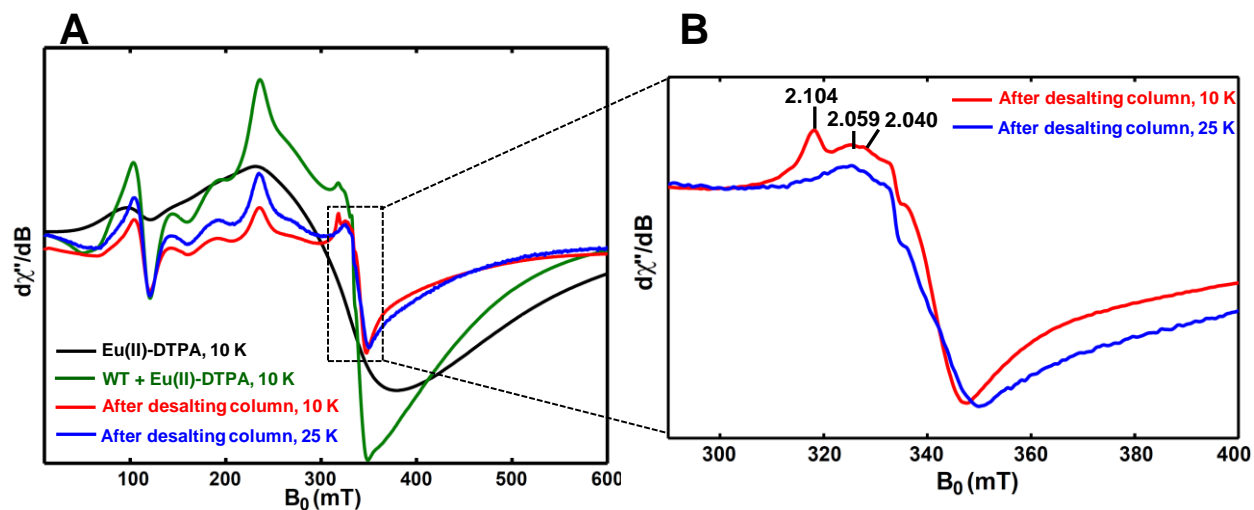

**Figure S11.** X-band (9.37 GHz) CW EPR spectra of Eu(II)-DTPA-reduced wild-type PqqE before and after desalting. The  $g_1$  value of 2.104, 2.059 and 2.040 is corresponding to the AuxI  $[4\text{Fe}-4\text{S}]^+$  cluster, the AuxII  $[4\text{Fe}-4\text{S}]^+$  cluster and the RS  $[4\text{Fe}-4\text{S}]^+$  cluster, respectively. The  $g_1$  2.004 of  $[2\text{Fe}-2\text{S}]^+$  is not well resolved due to the overlap in the central region. The CW EPR spectra were recorded by using 2.518 mW microwave power at 10 K.

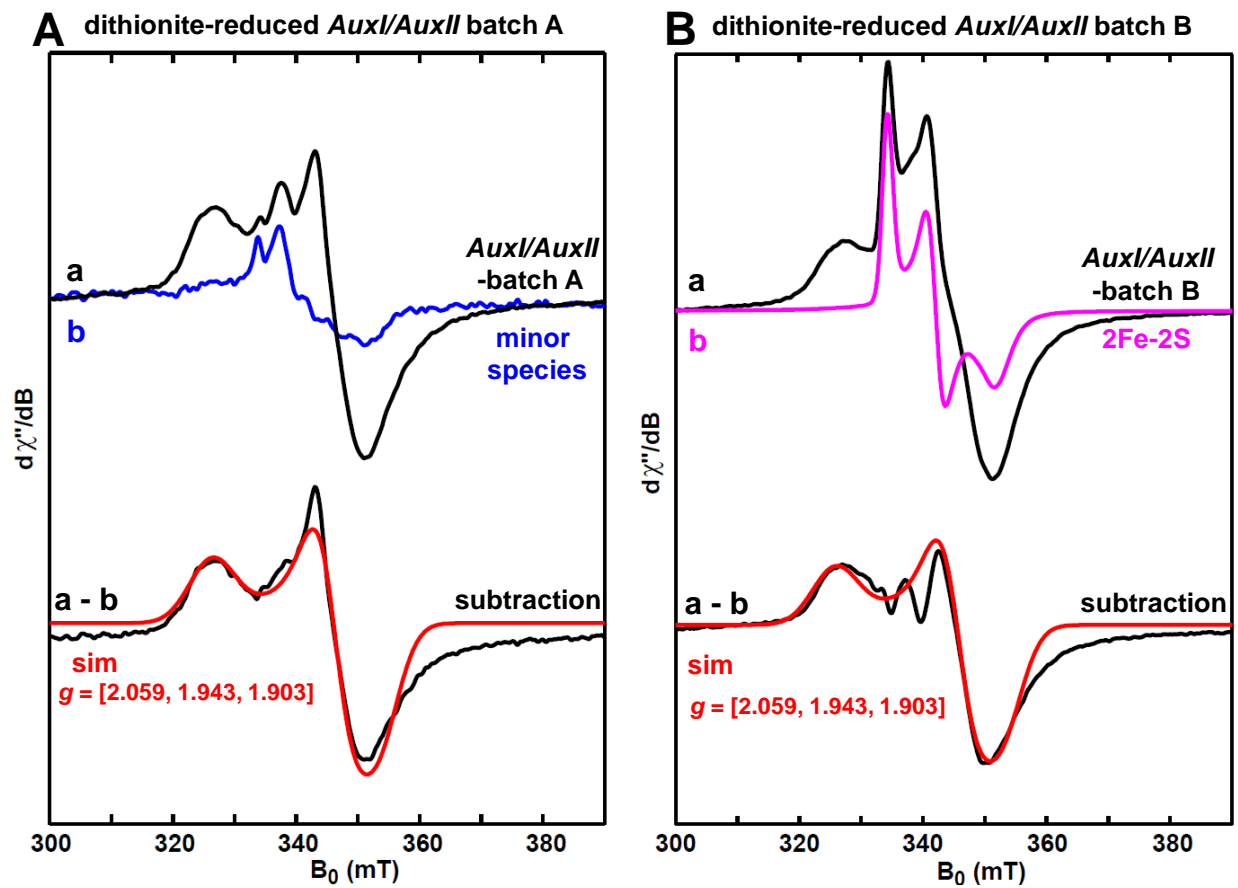

**Figure S12.** X-band (9.37 GHz) CW EPR of dithionite-reduced two batches of the *AuxI/AuxII* samples. The batch A spectrum is shown in Figure 6.

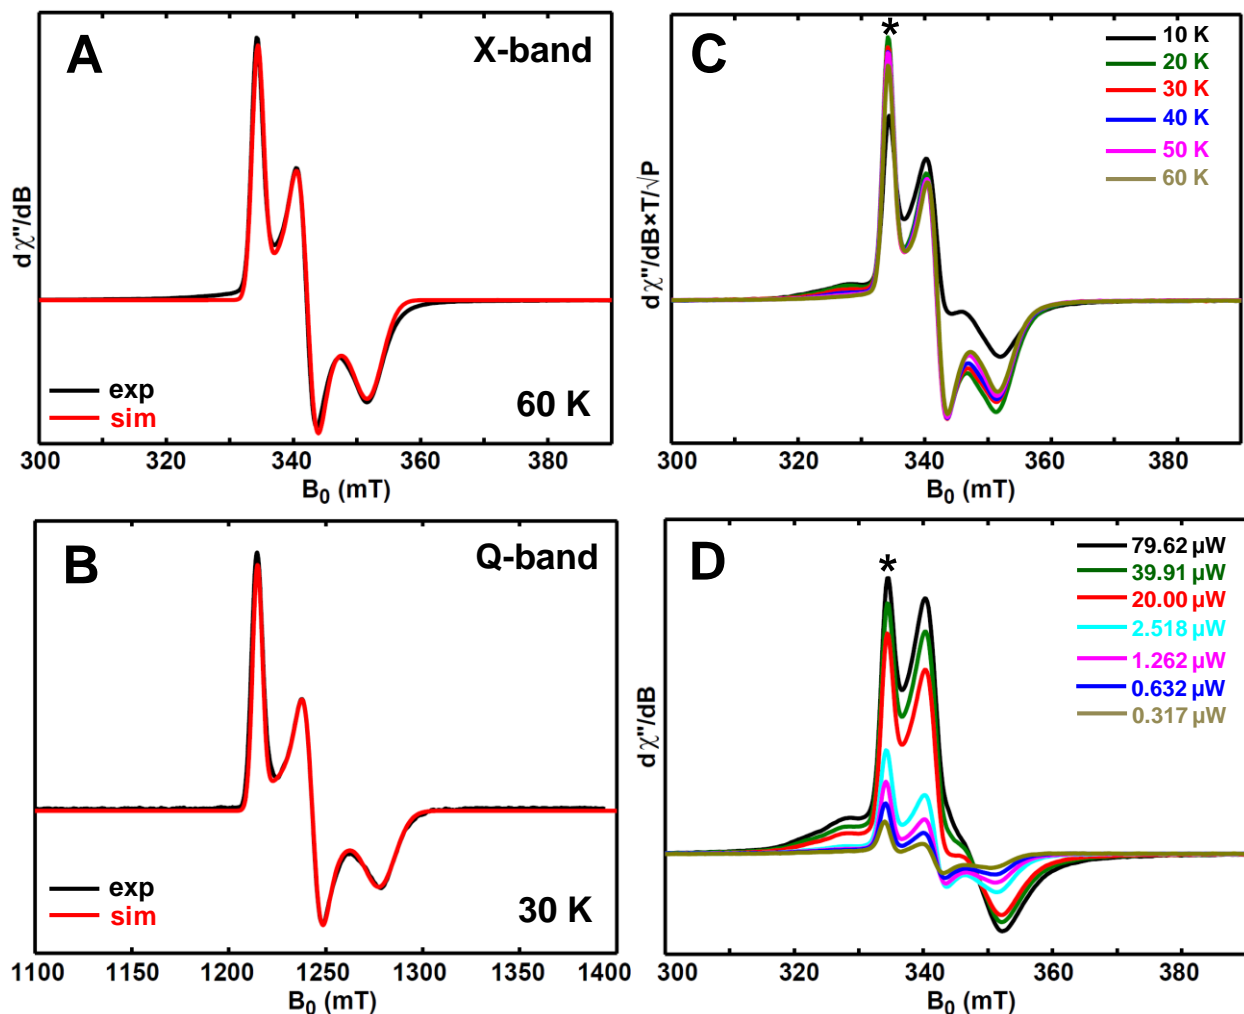

**Figure S13.** High temperature X-band (9.38 GHz, 60 K) CW EPR (A) and Q-band (34.0 GHz, 30 K) pseudo-modulated electron spin-echo detected field-swept EPR spectra (B) of dithionite-reduced *RS/AuxI*, showing only the  $[2\text{Fe-2S}]^+$  cluster signals. The black traces are experimental spectra, while the red traces are the simulated spectra by employing the  $g$ -values = [2.004, 1.958, 1.904]. The CW EPR spectra were recorded at 60 K, with 0.02 mW microwave power (no saturation). The Q-band EPR spectra were recorded at 30 K by using a two-pulse sequence of  $\pi/2$ - $\tau$ - $\pi$ - $\tau$ -echo, with  $\pi/2 = 12$  ns and  $\tau = 300$  ns. The modulation amplitude of 3.0 mT was used to convert the absorption spectra to the pseudo-modulated spectra in (B). Temperature dependence (C) and power dependence (D) of the EPR signals of dithionite-reduced *RS/AuxI* at 10 K. The asterisk indicates the  $g_1$  2.004 position, where the peak amplitudes are employed as the signal intensities of the  $[2\text{Fe-2S}]^+$  cluster (green triangles) shown in Figure 4. The small amount signal intensity from the RS cluster is omitted.
